# Supplementary material for: Recent and Historical Gene Flow in Cultivars, Landraces, and a Wild Taxon of Cucurbita pepo in Mexico
Source: Frontiers journal article supplement (doi:10.3389/fevo.2021.656051), 2021-05-28
Supplement: Table_1.xlsx [file Table_1.xlsx]

## Sheet: Supplementary Table_S1
Table S1. Information of 106 individuals sequenced using tGBS libraries, including population name, geographical coordinates and SRA accession.
Individual ID	Population name	Species	Latitude	Longitude	SRA accession
S_CHIS6	Jiquipilas, Chiapas (Outgroup)	Cucurbita argyrosperma ssp. sororia	16.5975	-93.6269	SRR12937355
S_CHIS8	Jiquipilas, Chiapas (Outgroup)	Cucurbita argyrosperma ssp. sororia	16.5975	-93.6269	SRR12937189
S_GRO2	Ometepec, Guerrero (Outgroup)	Cucurbita argyrosperma ssp. sororia	16.6881	-98.4063	SRR12937335
S_GRO3	Ometepec, Guerrero (Outgroup)	Cucurbita argyrosperma ssp. sororia	16.6881	-98.4063	SRR12937324
S_JAL2	Jalisco (Outgroup)	Cucurbita argyrosperma ssp. sororia	19.682	-104.333	SRR12937272
S_JAL13	Jalisco (Outgroup)	Cucurbita argyrosperma ssp. sororia	19.9123	-104.117	SRR12937260
S_JAL23	Jalisco (Outgroup)	Cucurbita argyrosperma ssp. sororia	19.691	-104.361	SRR12937249
S_OAX7	Puerto Escondido, Oaxaca (Outgroup)	Cucurbita argyrosperma ssp. sororia	15.9182	-97.0763	SRR12937282
S_OAX8	Puerto Escondido, Oaxaca (Outgroup)	Cucurbita argyrosperma ssp. sororia	15.9182	-97.0763	SRR12937281
S_OAX12	Puerto Escondido, Oaxaca (Outgroup)	Cucurbita argyrosperma ssp. sororia	15.9182	-97.0763	SRR12937276
Fra_01	Tamaulipas (wild)	Cucurbita pepo ssp. fraterna	-98.593	23.577	PRJNA485527
Fra_02	Tamaulipas (wild)	Cucurbita pepo ssp. fraterna	-98.593	23.577	PRJNA485527
Fra_03	Tamaulipas (wild)	Cucurbita pepo ssp. fraterna	-98.593	23.577	PRJNA485527
Fra_04	Tamaulipas (wild)	Cucurbita pepo ssp. fraterna	-98.593	23.577	PRJNA485527
Fra_05	Tamaulipas (wild)	Cucurbita pepo ssp. fraterna	-98.593	23.577	PRJNA485527
Fra_06	Tamaulipas (wild)	Cucurbita pepo ssp. fraterna	-98.593	23.577	PRJNA485527
Fra_07	Tamaulipas (wild)	Cucurbita pepo ssp. fraterna	-98.593	23.577	PRJNA485527
Fra_08	Tamaulipas (wild)	Cucurbita pepo ssp. fraterna	-98.593	23.577	PRJNA485527
Ovi_01	Ornamental mix from supermarket (Ornamental)	Cucurbita pepo ssp. ovifera var. ovifera	-	-	PRJNA485527
Ovi_02	Ornamental mix from supermarket (Ornamental)	Cucurbita pepo ssp. ovifera var. ovifera	-	-	PRJNA485527
Ovi_03	Ornamental mix from supermarket (Ornamental)	Cucurbita pepo ssp. ovifera var. ovifera	-	-	PRJNA485527
Ovi_04	Ornamental mix from supermarket (Ornamental)	Cucurbita pepo ssp. ovifera var. ovifera	-	-	PRJNA485527
Ovi_05	Ornamental mix from supermarket (Ornamental)	Cucurbita pepo ssp. ovifera var. ovifera	-	-	PRJNA485527
Ovi_06	Ornamental mix from supermarket (Ornamental)	Cucurbita pepo ssp. ovifera var. ovifera	-	-	PRJNA485527
Chh_01	Baborigame, Chihuahua (Landraces)	Cucurbita pepo ssp. pepo	-107.333	26.5	PRJNA485527
Chh_02	Baborigame, Chihuahua (Landraces)	Cucurbita pepo ssp. pepo	-107.333	26.5	PRJNA485527
Chh_03	Baborigame, Chihuahua (Landraces)	Cucurbita pepo ssp. pepo	-107.333	26.5	PRJNA485527
Chh_04	Baborigame, Chihuahua (Landraces)	Cucurbita pepo ssp. pepo	-107.333	26.5	PRJNA485527
Chh_05	Baborigame, Chihuahua (Landraces)	Cucurbita pepo ssp. pepo	-107.333	26.5	PRJNA485527
Dgo_01	Durango, Durango (Landraces)	Cucurbita pepo ssp. pepo	-104.583	24.066	PRJNA485527
Dgo_02	Durango, Durango (Landraces)	Cucurbita pepo ssp. pepo	-104.583	24.066	PRJNA485527
Dgo_03	Durango, Durango (Landraces)	Cucurbita pepo ssp. pepo	-104.583	24.066	PRJNA485527
Dgo_04	Durango, Durango (Landraces)	Cucurbita pepo ssp. pepo	-104.583	24.066	PRJNA485527
Slp_01	Villa Arista, San Luis Potosí (Landraces)	Cucurbita pepo ssp. pepo	-100.58	21.66	PRJNA485527
Slp_02	Villa Arista, San Luis Potosí (Landraces)	Cucurbita pepo ssp. pepo	-100.58	21.66	PRJNA485527
Zac_01	Villa Nueva, Zacatecas (Landraces)	Cucurbita pepo ssp. pepo	-102.87	22.475	PRJNA485527
Zac_02	Villa Nueva, Zacatecas (Landraces)	Cucurbita pepo ssp. pepo	-102.87	22.475	PRJNA485527
Zac_03	Villa Nueva, Zacatecas (Landraces)	Cucurbita pepo ssp. pepo	-102.87	22.475	PRJNA485527
Zac_04	Villa Nueva, Zacatecas (Landraces)	Cucurbita pepo ssp. pepo	-102.87	22.475	PRJNA485527
Jal_01	Ojuelos de Jalisco, Jalisco (Landraces)	Cucurbita pepo ssp. pepo	-101.583	21.666	PRJNA485527
Jal_02	Ojuelos de Jalisco, Jalisco (Landraces)	Cucurbita pepo ssp. pepo	-101.583	21.666	PRJNA485527
Jal_03	Ojuelos de Jalisco, Jalisco (Landraces)	Cucurbita pepo ssp. pepo	-101.583	21.666	PRJNA485527
Gto_01	Celaya, Guanajuato (Landraces)	Cucurbita pepo ssp. pepo	-101.733	20.4	PRJNA485527
Gto_02	Celaya, Guanajuato (Landraces)	Cucurbita pepo ssp. pepo	-101.733	20.4	PRJNA485527
Gto_03	Celaya, Guanajuato (Landraces)	Cucurbita pepo ssp. pepo	-101.733	20.4	PRJNA485527
Gto_04	Celaya, Guanajuato (Landraces)	Cucurbita pepo ssp. pepo	-101.733	20.4	PRJNA485527
Mic_01	Michoacan (Landraces)	Cucurbita pepo ssp. pepo	-100.75	19.7	PRJNA485527
Mic_02	Michoacan (Landraces)	Cucurbita pepo ssp. pepo	-100.75	19.7	PRJNA485527
Mic_03	Michoacan (Landraces)	Cucurbita pepo ssp. pepo	-100.75	19.7	PRJNA485527
Mic_04	Michoacan (Landraces)	Cucurbita pepo ssp. pepo	-100.75	19.7	PRJNA485527
Mic_05	Michoacan (Landraces)	Cucurbita pepo ssp. pepo	-100.75	19.7	PRJNA485527
Mic_06	Michoacan (Landraces)	Cucurbita pepo ssp. pepo	-100.75	19.7	PRJNA485527
Hid_01	Mezquital, Hidalgo (Landraces)	Cucurbita pepo ssp. pepo	-99.28	20.081	PRJNA485527
Hid_02	Mezquital, Hidalgo (Landraces)	Cucurbita pepo ssp. pepo	-99.28	20.081	PRJNA485527
Hid_03	Mezquital, Hidalgo (Landraces)	Cucurbita pepo ssp. pepo	-99.28	20.081	PRJNA485527
Hid_04	Mezquital, Hidalgo (Landraces)	Cucurbita pepo ssp. pepo	-99.28	20.081	PRJNA485527
Hid_05	Mezquital, Hidalgo (Landraces)	Cucurbita pepo ssp. pepo	-99.28	20.081	PRJNA485527
Hid_06	Mezquital, Hidalgo (Landraces)	Cucurbita pepo ssp. pepo	-99.28	20.081	PRJNA485527
Emx_01	Santa Cruz Tepezpan, EdoMex (Landraces)	Cucurbita pepo ssp. pepo	-99.733	19.566	PRJNA485527
Emx_02	Santa Cruz Tepezpan, EdoMex (Landraces)	Cucurbita pepo ssp. pepo	-99.733	19.566	PRJNA485527
Emx_03	Santa Cruz Tepezpan, EdoMex (Landraces)	Cucurbita pepo ssp. pepo	-99.733	19.566	PRJNA485527
Emx_04	Santa Cruz Tepezpan, EdoMex (Landraces)	Cucurbita pepo ssp. pepo	-99.733	19.566	PRJNA485527
Emx_05	Santa Cruz Tepezpan, EdoMex (Landraces)	Cucurbita pepo ssp. pepo	-99.733	19.566	PRJNA485527
Emx_06	Santa Cruz Tepezpan, EdoMex (Landraces)	Cucurbita pepo ssp. pepo	-99.733	19.566	PRJNA485527
Tix_01	Ixtenco, Tlaxca (Landraces)	Cucurbita pepo ssp. pepo	-97.9	19.25	PRJNA485527
Tix_02	Ixtenco, Tlaxca (Landraces)	Cucurbita pepo ssp. pepo	-97.9	19.25	PRJNA485527
Tix_03	Ixtenco, Tlaxca (Landraces)	Cucurbita pepo ssp. pepo	-97.9	19.25	PRJNA485527
Tvg_01	Españita, Tlaxca (Landraces)	Cucurbita pepo ssp. pepo	-98.466	19.371	PRJNA485527
Tvg_02	Españita, Tlaxca (Landraces)	Cucurbita pepo ssp. pepo	-98.466	19.371	PRJNA485527
Tvg_03	Españita, Tlaxca (Landraces)	Cucurbita pepo ssp. pepo	-98.466	19.371	PRJNA485527
Tvg_04	Españita, Tlaxca (Landraces)	Cucurbita pepo ssp. pepo	-98.466	19.371	PRJNA485527
Tvg_05	Españita, Tlaxca (Landraces)	Cucurbita pepo ssp. pepo	-98.466	19.371	PRJNA485527
Pue_01	San Antonio de Virreyes, Puebla (Landraces)	Cucurbita pepo ssp. pepo	-97.64	19.406	PRJNA485527
Pue_02	San Antonio de Virreyes, Puebla (Landraces)	Cucurbita pepo ssp. pepo	-97.64	19.406	PRJNA485527
Pue_03	San Antonio de Virreyes, Puebla (Landraces)	Cucurbita pepo ssp. pepo	-97.64	19.406	PRJNA485527
Pue_04	San Antonio de Virreyes, Puebla (Landraces)	Cucurbita pepo ssp. pepo	-97.64	19.406	PRJNA485527
Pue_05	San Antonio de Virreyes, Puebla (Landraces)	Cucurbita pepo ssp. pepo	-97.64	19.406	PRJNA485527
Pue_06	San Antonio de Virreyes, Puebla (Landraces)	Cucurbita pepo ssp. pepo	-97.64	19.406	PRJNA485527
Pue_07	San Antonio de Virreyes, Puebla (Landraces)	Cucurbita pepo ssp. pepo	-97.64	19.406	PRJNA485527
Pue_08	San Antonio de Virreyes, Puebla (Landraces)	Cucurbita pepo ssp. pepo	-97.64	19.406	PRJNA485527
Oax_03	Santo Domingo, Oaxaca (Landraces)	Cucurbita pepo ssp. pepo	-97.333	17.516	PRJNA485527
Oax_04	Santo Domingo, Oaxaca (Landraces)	Cucurbita pepo ssp. pepo	-97.333	17.516	PRJNA485527
Oax_05	Santo Domingo, Oaxaca (Landraces)	Cucurbita pepo ssp. pepo	-97.333	17.516	PRJNA485527
Oax_01	Santo Domingo, Oaxaca (Landraces)	Cucurbita pepo ssp. pepo	-97.333	17.516	PRJNA485527
Oax_06	Santo Domingo, Oaxaca (Landraces)	Cucurbita pepo ssp. pepo	-97.333	17.516	PRJNA485527
Oax_02	Santo Domingo, Oaxaca (Landraces)	Cucurbita pepo ssp. pepo	-97.333	17.516	PRJNA485527
Chs_01	San Cristobal de las Casas, Chiapas (Landraces)	Cucurbita pepo ssp. pepo	-92.642	16.773	PRJNA485527
Chs_02	San Cristobal de las Casas, Chiapas (Landraces)	Cucurbita pepo ssp. pepo	-92.642	16.773	PRJNA485527
Chs_03	San Cristobal de las Casas, Chiapas (Landraces)	Cucurbita pepo ssp. pepo	-92.642	16.773	PRJNA485527
Chs_04	San Cristobal de las Casas, Chiapas (Landraces)	Cucurbita pepo ssp. pepo	-92.642	16.773	PRJNA485527
Chs_05	San Cristobal de las Casas, Chiapas (Landraces)	Cucurbita pepo ssp. pepo	-92.642	16.773	PRJNA485527
Chs_06	San Cristobal de las Casas, Chiapas (Landraces)	Cucurbita pepo ssp. pepo	-92.642	16.773	PRJNA485527
Chs_07	San Cristobal de las Casas, Chiapas (Landraces)	Cucurbita pepo ssp. pepo	-92.642	16.773	PRJNA485527
Chs_08	San Cristobal de las Casas, Chiapas (Landraces)	Cucurbita pepo ssp. pepo	-92.642	16.773	PRJNA485527
Spa_01	Bahia Kino, Sonora (Improved)	C. pepo ssp. pepo Vegetable Marrow morphotype ‘Vegetable Spaghetti’	-111.821	28.789	PRJNA485527
Spa_02	Bahia Kino, Sonora (Improved)	C. pepo ssp. pepo Vegetable Marrow morphotype ‘Vegetable Spaghetti’	-111.821	28.789	PRJNA485527
Spa_03	Bahia Kino, Sonora (Improved)	C. pepo ssp. pepo Vegetable Marrow morphotype ‘Vegetable Spaghetti’	-111.821	28.789	PRJNA485527
Spa_04	Bahia Kino, Sonora (Improved)	C. pepo ssp. pepo Vegetable Marrow morphotype ‘Vegetable Spaghetti’	-111.821	28.789	PRJNA485527
Zuc_01	Botanical interests, Cat No. 3049; Lot #1 (Improved)	C. pepo ssp. pepo Zucchini morphotype ‘Black Beauty’	-	-	PRJNA485527
Zuc_02	Botanical interests, Cat No. 3049; Lot #1 (Improved)	C. pepo ssp. pepo Zucchini morphotype ‘Black Beauty’	-	-	PRJNA485527
Coc_01	Botanical interests, Cat No. 3107; Lot #15 (Improved)	C. pepo ssp. pepo Cocozelle morphotype	-	-	PRJNA485527
Coc_02	Botanical interests, Cat No. 3107; Lot #15 (Improved)	C. pepo ssp. pepo Cocozelle morphotype	-	-	PRJNA485527
Coc_03	Botanical interests, Cat No. 3107; Lot #15 (Improved)	Cucurbita pepo ssp. pepo var. pepo	-	-	PRJNA485527
Del_01	Botanical interests, Cat No. 3076; Lot #15 (Improved)	C. pepo ssp. ovifera Acorn morphotype ‘Delicata Honey Boat’	-	-	PRJNA485527
Del_02	Botanical interests, Cat No. 3076; Lot #15 (Improved)	C. pepo ssp. ovifera Acorn morphotype ‘Delicata Honey Boat’	-	-	PRJNA485527
Str_01	Botanical interests, Cat No. 3006; Lot #1 (Improved)	C. pepo ssp. ovifera Straightneck morphotype ‘Early prolific Straightneck’	-	-	PRJNA485527

## Sheet: Supplementary Table_S2
Table S2. Values of genetic diversity for the different accessions of C. pepo ssp. pepo from 14 states of Mexico, and the different accessions of commercial varieties. N = number of individuals, Pa = private alleles, HO = observed heterozygosity, HE = expected heterozygosity and FIS = inbreeding coefficient.
Population	N	Pa	HO	HE	FIS
Localities of landraces
Chihuahua	5	2	0.17	0.169	0.049*
Durango	4	0	0.147	0.162	0.082*
Zacatecas	2	0	0.174	0.138	0.021*
San Luis Potosí	2	1	0.095	0.065	–0.012*
Jalisco	3	1	0.173	0.165	0.052*
Guanajuato	3	1	0.202	0.163	0.004*
Michoacán	6	1	0.144	0.18	0.126*
Estado de México	3	1	0.138	0.149	0.085*
Hidalgo	6	1	0.179	0.161	–0.004*
Tlaxcala	8	8	0.201	0.178	–0.022*
Puebla	8	7	0.169	0.183	0.062*
Oaxaca	6	3	0.173	0.185	0.071*
Chiapas	8	5	0.173	0.18	0.052*
Improved varieties
C. pepo ssp. pepo Vegetable Marrow morphotype ‘Vegetable Spaghetti’	2	1	0.189	0.145	0.012*
C. pepo ssp. pepo Cocozelle morphotype	2	4	0.183	0.135	0
C. pepo ssp. ovifera Straightneck morphotype ‘Early prolific Straightneck’	2	0	0.163	0.127	0.019*
C. pepo ssp. ovifera Acorn morphotype ‘Delicata Honey Boat’	4	0	0.149	0.148	0.05
C. pepo ssp. pepo Zucchini morphotype ‘Black Beauty’	1	0	0.23	-	0
*p < 0.05

## Sheet: Supplementary Table_S3
Table S3. P values of the paired test to analyze if the HE values obtained between populations had significant differences.
	Zucchini	Chihuahua	Chiapas	Cocozelle	Delicata	Durango	Estado de México	Spaghetti	Fraterna	Guanajuato	Tlaxcala	Jalisco	Hidalgo	Michoacán	Oaxaca	Ovifera	San Luis Potosí	Straightneck	Puebla
Chihuahua	0.907
Chiapas	0.709	0.685
Cocozelle	1	0.284	0.181
Delicata	0.666	0.046*	0.046*	0.664
Durango	0.030*	0.235	0.162	0.931	0.866
Estado de México	0.26	0.208	0.087	0.899	0.395	0.46
Spaghetti	0.392	0.063	0.023*	0.603	0.664	0.398	0.859
Fraterna	0.685	0.264	0.608	0.593	0.292	0.359	0.371	0.119
Guanajuato	0.408	0.737	0.37	0.295	0.097	0.944	0.2	0.535	0.244
Tlaxcala	0.736	0.559	0.751	0.692	0.245	0.519	0.382	0.195	0.3	0.88
Jalisco	0.394	0.84	0.362	0.294	0.193	0.773	0.199	0.372	0.228	1	0.239
Hidalgo	0.825	0.737	0.058	0.823	0.505	0.857	0.677	0.406	0.028*	0.943	0.099	0.972
Michoacán	0.637	0.183	0.917	0.561	0.357	0.182	0.271	0.079	0.674	0.729	0.857	0.601	0.041*
Oaxaca	0.542	0.156	0.625	0.427	0.3	0.082	0.166	0.008*	0.908	0.644	0.55	0.611	0.021*	0.261
Ovifera	0.809	0.385	0.662	0.674	0.474	0.348	0.262	0.124	0.3	0.799	0.675	0.915	0.252	0.645	0.189
San Luis Potosí	0.332	0.048*	0.022*	0.328	0.333	0.065	0.103	0.263	0.022*	0.102	0.039*	0.102	0.021*	0.038*	0.036*	0.050*
Straightneck	0.672	0.834	1	1	0.671	1	1	0.406	1	0.749	0.776	1	0.86	0.723	0.856	0.67	0.664
Puebla	0.679	0.451	0.862	0.551	0.361	0.507	0.471	0.269	0.15	0.889	0.448	0.828	0.021*	0.999	0.7	0.877	0.048*	0.667
Zacatecas	1	0.096	0.11	1	0.663	0.401	0.704	0.801	0.089	0.602	0.063	0.204	0.291	0.208	0.181	0.191	0.34	0.669	0.137
*p < 0.05

## Sheet: Supplementary Table_S4
Table S4. P values of the paired test to analyze if the HE values obtained between taxonomic groups had significant differences.
	Landraces	Wild	Ornamental
Wild	0.092
Ornamental	0.762	0.307
Improved	0.336	1	0.836
*p < 0.05
